# Supplementary material
Source: PubMed Central journal article supplement (PMC8060207)
Supplement: 10928_2020_9730_MOESM1_ESM.pdf [file 10928_2020_9730_MOESM1_ESM.pdf]

## Supplemental Material Code

### Population Pharmacokinetic Model of Intramuscular and Oral Dexamethasone and Betamethasone in Indian Women

Wojciech Krzyzanski, Mark A Milad, Alan H Jobe, Thomas Peppard, Robert M Bies, William J Jusko

#### NONMEM control stream for BET with an excerpt from a data set

```
$PROB BETAMATHASONE PK
$INPUT ID TIME AMT CMT CONC DV EVID MDV BLQ PER SEQ BW
$DATA C:\BET.CSV IGNORE=C
$SUBROUTINES ADVAN13 ATOL=12 TOL=12
$MODEL NCOMPARTMENTS=5
COMP=(IM)
COMP=(PLASMA)
COMP=(PERI)
COMP=(PO)
COMP=(IMA)
$PK
      CL      = THETA(1)*EXP(ETA(1))
      V       = THETA(2)*EXP(ETA(2))
      KAIM    = THETA(3)*EXP(ETA(3))
      KAIMA   = THETA(4)*EXP(ETA(4))
      KAPO    = THETA(5)*EXP(ETA(5))
      FR      = THETA(6)*EXP(ETA(6))
      FRA     = THETA(7)*EXP(ETA(7))
      CLD     = THETA(8)
      VT      = THETA(9)
      F4 = FR
```

```

F5 = FRA
;INITIAL CONDITIONS
A_0(1) = 0
A_0(2) = 0
A_0(3) = 0
A_0(4) = 0
A_0(5) = 0
$DES
DADT(1) = - KAIM*A(1)
DADT(2) = KAIM*A(1)+KAPO*A(4)+KAIMA*A(5)-CL/V*A(2)-
          CLD/V*A(2)+CLD/VT*A(3)
DADT(3) = CLD/V*A(2)-CLD/VT*A(3)
DADT(4) = - KAPO*A(4)
DADT(5) = - KAIMA*A(5)
$error
IPRED=-10
IF (CMT.EQ.2) IPRED= LOG(A(2)/V)
SD=SQRT(SIGMA(1))
LLOQ=LOG(0.1)
IF (BLQ.EQ.0) THEN
  F_FLAG=0
  Y=IPRED + EPS(1)
ENDIF
IF (BLQ.EQ.1) THEN
  F_FLAG=1
  Y=PHI((LLOQ-IPRED)/SD)
ENDIF
$EST METHOD=COND INTERACTION LAPLACIAN NUMERICAL SLOW PRINT=1
MAX=9999 SIG=3 NOABORT

```

\$THETA

\$THETA

(0,5.95 , ) ;1. L/h CL  
(0,67.5, ) ;2. L V  
(0,0.971, ) ;3. 1/h KAIM  
(0,0.00638, ) ;4. 1/h KAIMA  
(0,1.21, ) ;5. 1/h KAPO  
(0,0.935, ) ;6. FR  
(0,0.819, ) ;7. FRA  
(0,0.173,) ;8. L/h CLD  
(0,4.94,) ;9. L VT

\$OMEGA BLOCK(2)

0.021 ;1. CL  
0.0155 ; COV(CL,V)  
0.0188 ;2. V

\$OMEGA

0.0441 ;3. KAIM  
0.147 ;4. KAIMA  
0.241 ;5. KAPO  
0.0182 ;6. FRA  
0.00773 ;7. FRA

\$SIGMA

0.0211

\$COV PRINT=E SLOW

\$TABLE ID TIME CMT MDV IPRED CIWRES SEQ PER

| C | ID | TIME | AMT | CMT | DV | EVID | MDV | BLQ | PER | SEQ  | BW |
|---|----|------|-----|-----|----|------|-----|-----|-----|------|----|
| 2 | 0  | 6000 | 1   | .   | 1  | 1    | 0   | 1   | 21  | 54.7 |    |

|   |        |   |   |         |   |   |   |   |    |      |
|---|--------|---|---|---------|---|---|---|---|----|------|
| 2 | 0.0001 | . | 2 | -2.3035 | 0 | 1 | 1 | 1 | 21 | 54.7 |
| 2 | 0.5    | . | 2 | 3.2742  | 0 | 0 | 0 | 1 | 21 | 54.7 |
| 2 | 1      | . | 2 | 3.8296  | 0 | 0 | 0 | 1 | 21 | 54.7 |
| 2 | 1.5    | . | 2 | 3.9077  | 0 | 0 | 0 | 1 | 21 | 54.7 |
