# Supplementary material
Source: PubMed Central journal article supplement (PMC8060207)
Supplement: 10928_2020_9730_MOESM2_ESM.pdf [file 10928_2020_9730_MOESM2_ESM.pdf]

## Supplemental Material Tables and Figures

### Population Pharmacokinetic Model of Intramuscular and Oral Dexamethasone and Betamethasone in Indian Women

Wojciech Krzyzanski, Mark A Milad, Alan H Jobe, Thomas Peppard, Robert M Bies, William J Jusko

**Table 1S.** Secondary pharmacokinetic descriptors. The  $C_{max}$ ,  $t_{max}$ , and  $t_{1/2}$  were calculated for individual predicted plasma concentrations. Data are presented as mean  $\pm$ SD of individual estimates for each dosing group

| Treatment | $C_{max}$ , ng/mL | $t_{max}$ , h | $t_{1/2}$ , h   | $MRT$ , h       |
|-----------|-------------------|---------------|-----------------|-----------------|
| DEX-P IM  | 62.5 $\pm$ 6.1    | 3.3 $\pm$ 0.5 | 7.5 $\pm$ 0.1   | 7.81 $\pm$ 0.57 |
| DEX-P PO  | 78.9 $\pm$ 13.5   | 2.2 $\pm$ 0.8 | 7.6 $\pm$ 0.3   | 6.91 $\pm$ 1.20 |
| BET-P IM  | 66.9 $\pm$ 8.4    | 2.8 $\pm$ 0.4 | 14.9 $\pm$ 0.7  | 12.1 $\pm$ 0.74 |
| BET-P PO  | 65.9 $\pm$ 7.9    | 2.6 $\pm$ 0.8 | 18.7 $\pm$ 6.8  | 12.5 $\pm$ 1.13 |
| BET-PA IM | 35.8 $\pm$ 4.7    | 2.9 $\pm$ 0.4 | 77.6 $\pm$ 14.3 | 96.5 $\pm$ 33.2 |

**Table 2S.** Simulated maximum ( $C_{max}$ ) and trough ( $C_{trough}$ ) plasma concentrations, and area under the curve ( $AUC$ ) values for the three dosing regimens commonly used for treatment of antenatal corticosteroids as shown in Fig. 8. The values are reported as median [Q5, Q95] of N=200 simulated subjects.

| Regimen           | $C_{max}$ , ng/mL   | $C_{trough}$ , ng/mL | $AUC_{0-48}$ , ng/mL·h | $AUC_{0-72}$ , ng/mL·h |
|-------------------|---------------------|----------------------|------------------------|------------------------|
| DEX 6 mg IM 4xBID | 71.6 [69.6,74.0]    | 33.1 [31.0,35.0]     | 2366 [1869, 2977]      | 2521 [1948, 3272]      |
| BET 12 mg IM 2xQD | 144.2 [139.9,148.8] | 26.4 [25.3,27.5]     | 3594 [2881,4454]       | 3861 [3073,4822]       |
| CEL 12 mg IM 2xQD | 77.4 [75.0,80.4]    | 17.1 [16.4,17.9]     | 2021 [1620, 2508]      | 2342 [1862,2929]       |

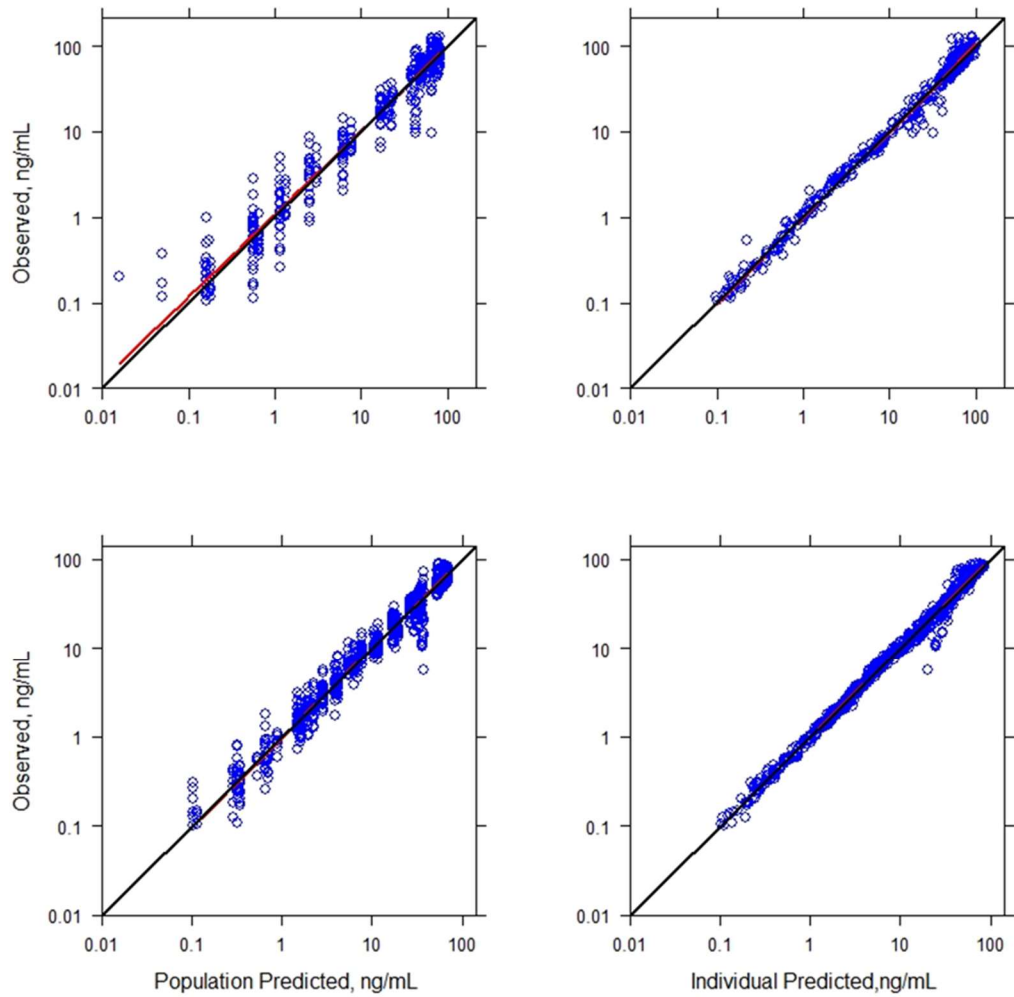

**Fig. 1S.** Observed versus predicted diagnostic plots for DEX (upper panels) and BET (lower panels) plasma concentrations. The red lines are the LOESS curves.

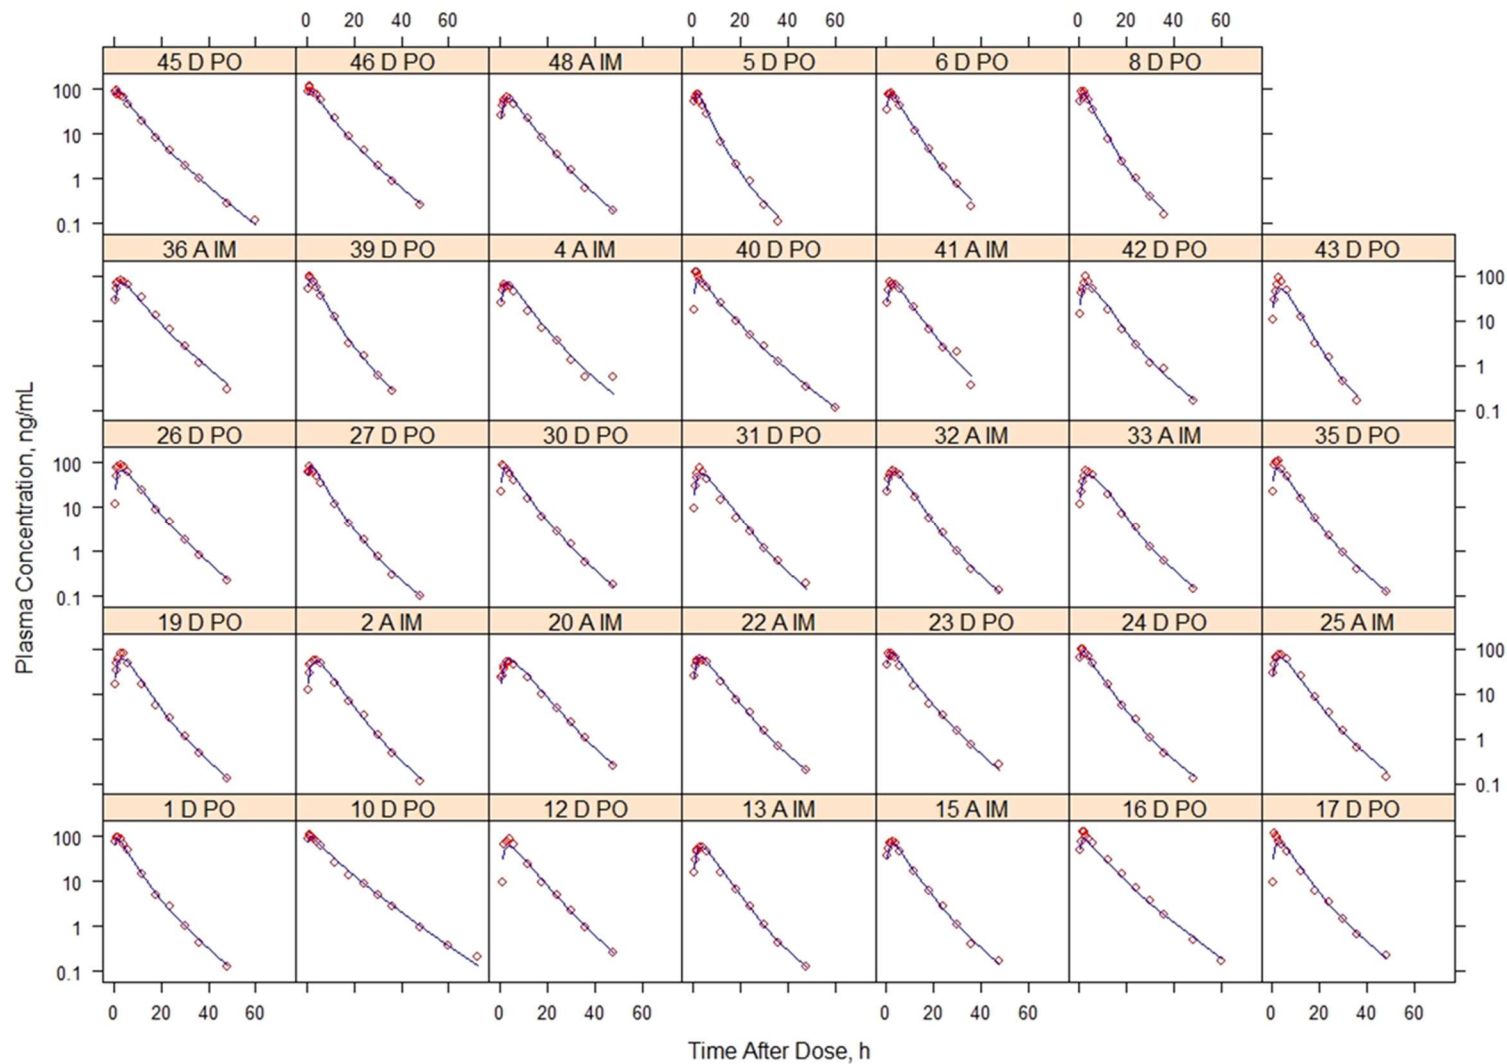

**Fig. 2S.** Individual plots of DEX observed (symbols) and predicted (lines) plasma concentrations vs time for DEX-IM and DEX-PO administered in sequences AB, BA, CD, DC, DE, and ED. Subject numbers, sequence, and dosing routes are indicated

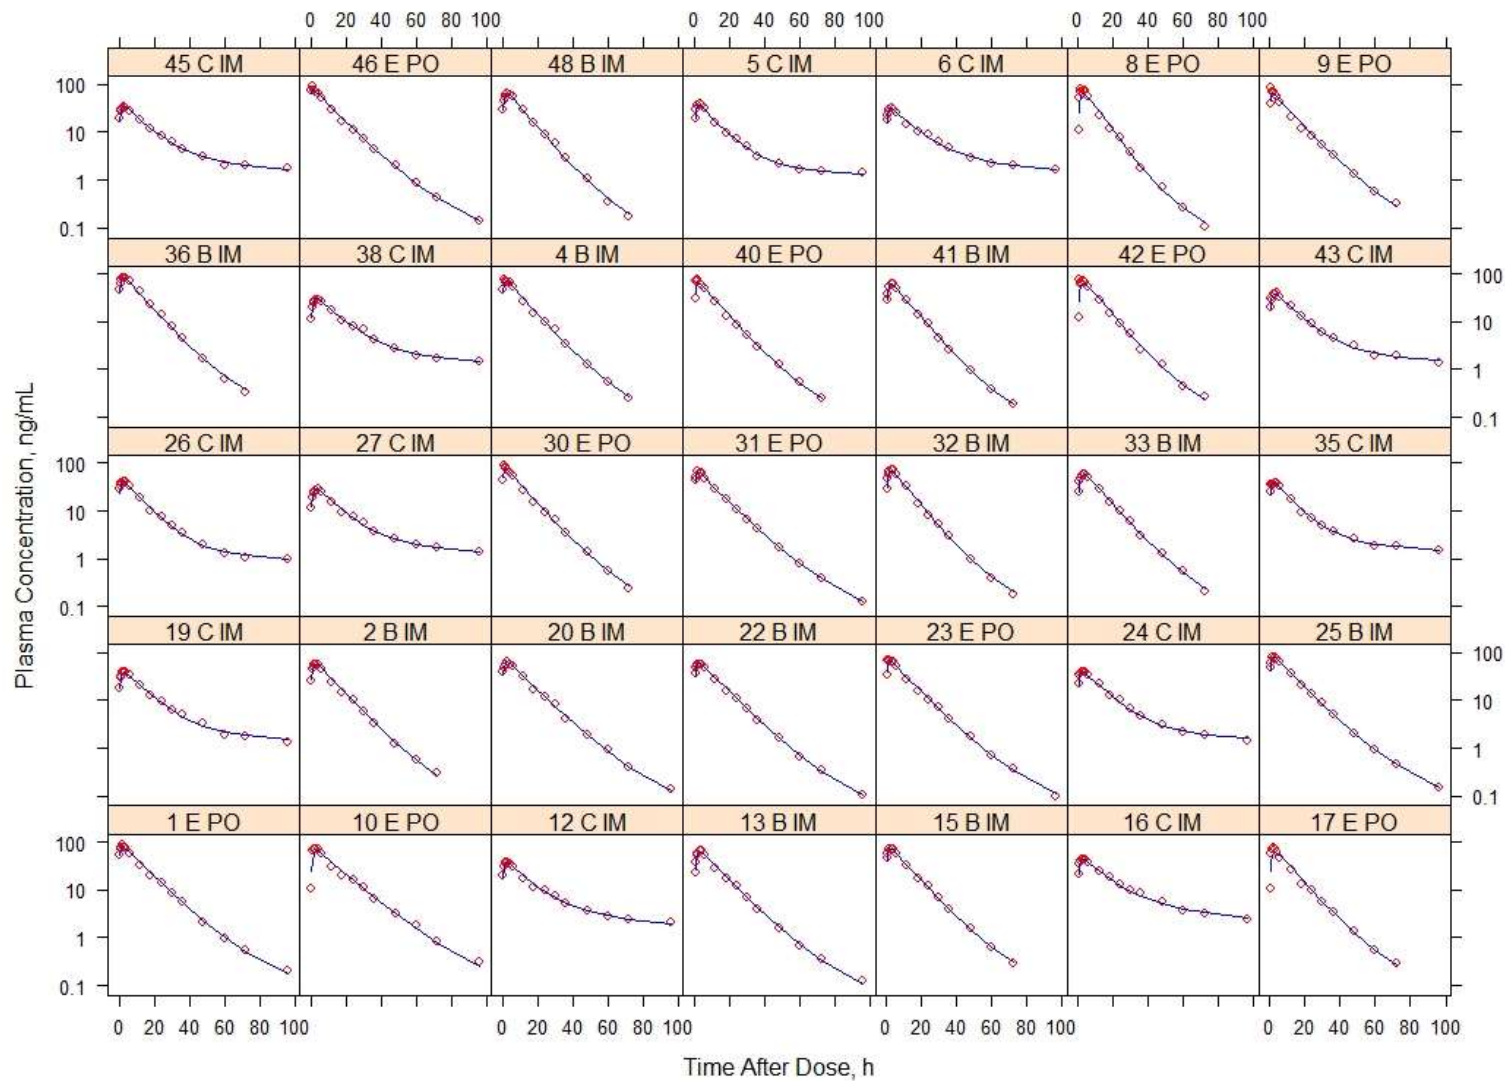

**Fig. 3S.** Individual plots of BET observed (symbols) and predicted (lines) plasma concentrations vs time for BET-IM, BET-PO and BET-PA administered in sequences AB, BA, CD, DC, DE, and ED. Subject numbers, sequence, and dosing routes are indicated.

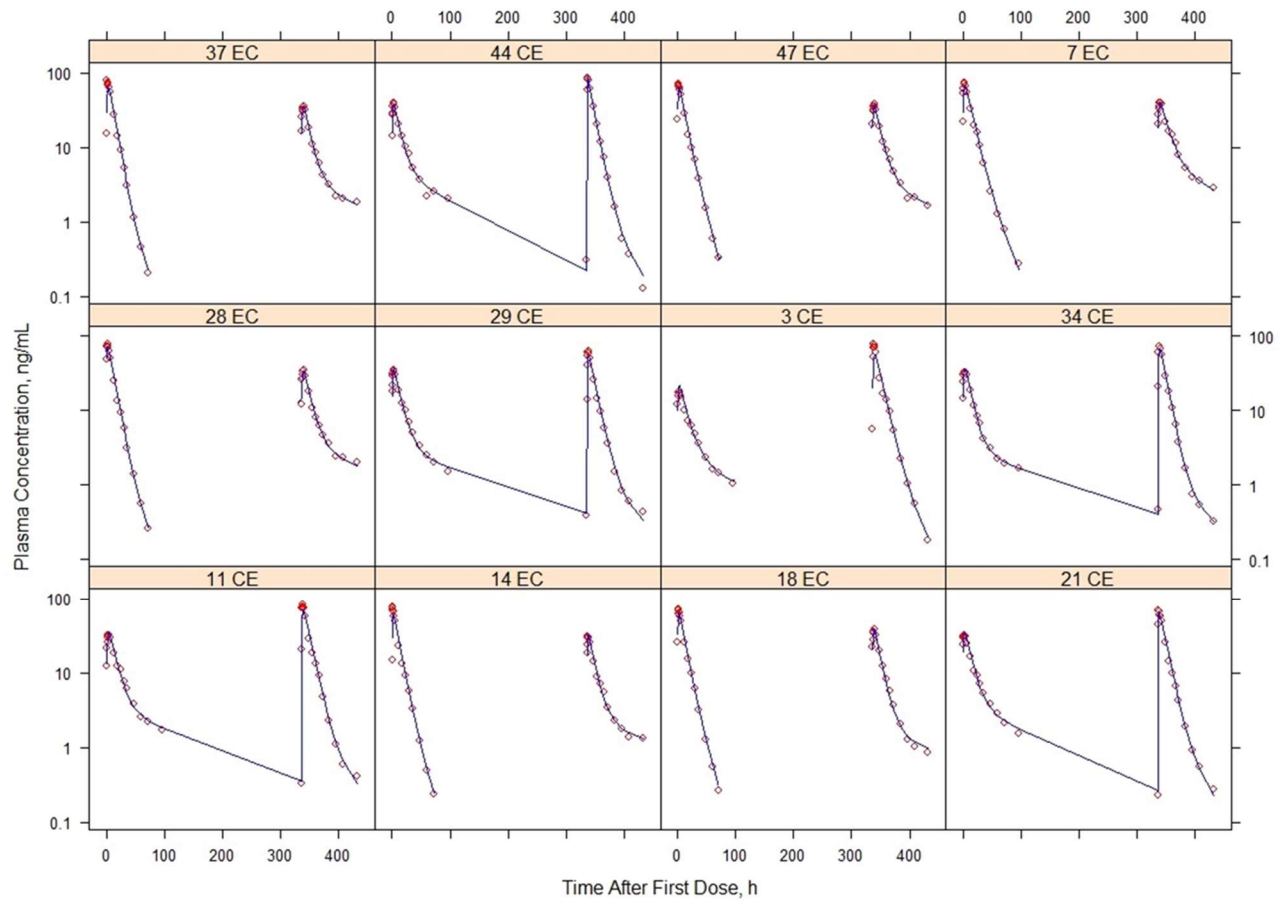

**Fig. 4S.** Individual plots of BET observed (symbols) and predicted (lines) plasma concentrations vs time for BET PO and BET PA administered in sequences CE and EC. Subject numbers, sequence, and dosing routes are indicated.
